# Supplementary material
Source: PubMed Central journal article supplement (PMC365759)
Supplement: pnas_101_9_3154__1.pdf [file pnas_101_9_3154__1.pdf]

#NEXUS  
[This alignment contains the confidently alignable positions of UK, UK-UPRT and UPRT. This file is a single alignment of all three genes. UK sequences are the first sequences in the alignment, the fused UK-UPRT sequences are in the middle and the UPRT only sequences are the last sequences in the alignment.]

Begin data;  
Dimensions ntax=67 nchar=487;  
Format datatype=protein interleave symbols="1234" gap=-;

Matrix  
18699734\_Homo NGGEPFLIGVSGGTASGK-SSVCAKIVQLLGQNEVDY-RQK-QVVILSQDSFYR--VLTS  
13899253\_Homo HQR-PFLIGVSGGTASGK-STVCEKIMELLGQNEVEQ-RQR-KVVILSQDRFYK--VLTA  
24649624\_Drosophila EVKSPFLIGVAGGTASGK-STVCKKIMEQLGQAEMDH-TQR-QVVSISQDSFYR--ELTP  
17538198\_Caenorhabditis TLKLP LLIGVAGGTSCGK-STIVERI IENLNANAKQSGRQI-DIVHLSLHSFYR--ELSA  
28828393\_Dictyostelium HSKHPFIIGVTGGTASGK-TTVCDEIMKRLE-----NK-RIAIICLDSFYR--PLS-  
Entamoeba\_sangerUK -NNPTVLI AVAGGTASGK-TTFCQEIAN TLKGE-----KFVVISQDSFYR----PL  
Paramecium1UK YEPQRILVGV TGGSAAGK-TTLCETIKREIQYDS-----DV-DMTILSCDSFYK--GVD-  
15641051\_Vibrio ENNQCVIVGIAGASASGK-SLIASTIYNELR----AKVGDH-QIGVITEDCYK--DQS-  
26248441\_Escherichia QSHQCVIIGIAGASASGK-SLIASTLYREL R----EQVGDE-HIGVIPEDCYK--DQS-  
16272099\_Haemophilus SNPSCIIIAITGASASGK-SSIASTVHKELC----NELGCQ-EIGIITEDSYK--DQS-  
15613838\_Bacillus MGKRPIIIGVAGGTGSGK-T----TVAKEIF----YQFNEK-SIVLIEQDAYYK--DQS-  
15594361\_Borrelia -----IIGISGGSGSGK-TTVVSKISEFIP-----EFVLISQDNYYK--SVG-  
20455345\_Chlamydomphila M----MIIGITGGSGAGK-TTLTQNIKEIFG-----E-DVSVICQDNYYK--DRS-  
20455343\_Deinococcus P----FVIGVAGGSGSGK-TTVTRRVIETVG-----RE-GVAVLNQDNYYR--DQS-  
1351377\_Mycoplasma --EKGILVAISGGSCSGK-TTVAEMIYQLLS-----KCLKVAIICQDNYYK--SYK-  
20455342\_Ureaplasma S--P-ILILIAGASGSGK-TTFANEI IARIP-----KNTTSVVICQDSYII--SNS-  
20455333\_Listeria P----IVVGV TGGSGSGK-TSVTKAICDHFS-----GH-SILMIAQDVYYH--DQA-  
17229842\_Nostoc P----IILGIVGDSAAGK-TTLTRGIAQVLG-----PE-NVTLIC TDDYHR--YDR-  
16331050\_Synechocystis L-DRVVLIGVAGDSGCGK-STFLRRLTDLFG-----EEFMTVICLDDYHS--LDR-  
15790282\_Halobacterium S----FAIGIAGGTGAGK-TTVAREITDNVG-----E-SATLIPLDNYE--DLS-  
6320223\_Saccharomyces VEEKRIVISIGGGHATGVG-AIALDLQNTFK-----S-----LYN--SIN-  
1730776\_Saccharomyces K---VILVALSGCSSSGK-TTIAKLTASLFT-----KATLIHEDDFYKH-DNE-  
6324339\_Saccharomyces PWTTPYIIGIGGASGSGK-TSVAAKIVSSIN-----VP-WTVLISLDFNYYN--PLGP  
22026891\_Drosophila -----MDCFYK--ILNE  
8923487\_Homo QSKEAFAIGLGGGSASGK-TTVARMII EALD-----VP-WVLLSMDSFYK--VLTE  
TC909826\_Mus QSKEAFAIGLGGGSASGK-TTVARMII EALD-----VP-WVLLSMDSFYK--VLTE  
15232108\_Arabidopsis APHQPFVIGVTGGTASGK-TTVCDMIIQQLH-----DH-RIVLVNQDSFYR--GLT-  
15222778\_Arabidopsis EHGQPFVIGVAGGAASGK-TTVCDMIMQQLH-----DQ-RAVVVNQDSFYH--NVN-  
TC162174\_Glycine -----  
18416764\_Arabidopsis -----MIIQQLH-----DQ-RVVLINLDSFYH--NLT-  
TC193979\_Zea -----Q-RVAVTQESFYI--GLT-  
15232164\_Arabidopsis PLKQPFVIGVAGGTASGK-TTVCNMIMSOLH-----DQ-RVVLVNQDSFYH--SLT-  
Dictyostelium\_sanger ---NPLVIGVCGGSASGK-TTVCDKIIANLN-----VR-WVLLSMDSFYKN-----  
chlamyUKUPRT -----  
CryptoUKUPRT SNSNVFVI AVAGGSASGK-TSVCTRIFSELG-----DK-RVTVIETDSFYK--TPV-  
137110\_Saccharomyces PWTTPYIIGIGGASGSGK-TSVAAKIVSSIN-----VP-WTVLISLDFNYYNPLGPE-  
17539892\_Caenorhabditis SLKHPFVIGVCGGSASGK-TTVAEKIVERLG-----IP-WVTILSMDSFYK--VLTP  
28923467\_Neurospora ---DVSIIIGIAGSSGSGK-STLSQAI VKKLN-----LP-WVILSIDSFYK--SLDA  
2499951\_Toxoplasma -----  
21358379\_Drosophila -----  
21450816\_Homo -----  
Paramecium4UPRT -----  
18312741\_Pyrobaculum -----  
29348200\_Bacteroides -----  
17546907\_Ralstonia -----  
22968125\_Rhodospirillum -----  
16080742\_Bacillus -----  
15835447\_Chlamydia -----

15803021\_Escherichia -----  
 23475563\_Desulfovibrio -----  
 22970181\_Chloroflexus -----  
 15643484\_Thermotoga -----  
 19551914\_Corynebacterium -----  
 23126288\_Nostoc -----  
 6647900\_Nicotiana -----  
 15607101\_Aquifex -----  
 28917005\_Neurospora -----  
 29841457\_Schistosoma -----  
 17506069\_Caenorhabditis -----  
 18203426\_Deinococcus -----  
 19703818\_Fusobacterium -----  
 22654174\_Streptococcus -----  
 120609\_Saccharomyces -----  
 22654176\_Mesorhizobium -----  
 Leishmania\_sanger -----  
 Tbrucei\_sanger -----  
 Crypto\_uprt -----

18699734\_Homo EQKAKALKGQFNFDHPDAFDNELILKTLKEITEGKT-----VQIPVYDFVSHS-R  
 13899253\_Homo EQKAKALKGQYNFDHPDAFDNDLMHRTLKNIVEGKT-----VEVPTYDFVTHS-R  
 24649624\_Drosophila AEKAKAQKGLFNFDHPDAFNEELMYSTLQNILKGHK-----VEIPSYDYRTNS-L  
 17538198\_Caenorhabditis EEKILAREGKFNFDHPDQINFDLLAETLQNMIDGKT-----VEIPKYDMITSS--  
 28828393\_Dictyostelium -KEDRETVASYNFDHPDAFDWLSVENALRDLKDGKD-----IEIPTCYFKSHSRL  
 Entamoeba\_sangerUK TKEEHDNVAEYNFDSPSSFDWDLIIDTLKKIKAKKN-----VSLPVYDYVTHSRK  
 ParameciumlUK --KSFYDISQYNFDHPDSDLDFDNAFEVISTLLSGRP-----ASVPIYCFVNHK-R  
 15641051\_Vibrio -HLSMEERVKTNYDHPDSDLDHLLCQHLQMLARGEA-----VEVPEYSYTEHT-R  
 26248441\_Escherichia -HLSMEERVKTNYDHPDSDHSLLEHLQALKRGS-----IDLPVYSYVEHT-R  
 16272099\_Haemophilus -HEMTERVKTNYDHPNSMDRDLIQLHLKLNKNGSA-----VDVPVYSYVEHT-R  
 15613838\_Bacillus -QLSLEERLQTNFDHPLAFDNDLLIEHLHSLLNQQA-----IEKPVYDYKLHT-R  
 15594361\_Borrelia -DYEHE-FSKVNFDPDAFDNLFYEHLKLNKKNKNSP-----IDMPYDFINHK--  
 20455345\_Chlamydomonada -HYTPEERANLIWDHPDAFDNDLLISDIKRLKNNIEI-----VQAPYDFVVLGN--  
 20455343\_Deinococcus -DIPFESRLHTNYDHPDAFDWALLREQLDALLAGVP-----IEMPEYDFVQHT--  
 1351377\_Mycoplasma -NKPLLKRKTINFDHPDAFDWKLRLSHIEDLLNGSI-----VNVPLYDYINYT--  
 20455342\_Ureaplasma -QLNKKERRLINYDHPSSFEWELMREQLSDIKKRKK-----IKVPIYDYKTEI--  
 20455333\_Listeria -DISFEERLKVNYDHPDPLAFDLDLISHIAALRRYET-----IEKPIYDYEKYT--  
 17229842\_Nostoc -QORA--EIGITALHPDCNHLDIMQOHLSSLRTGQP-----ILKPVYSHKTGS--  
 16331050\_Synechocystis -QGRK--AAGVTALDPRANFDLMEQIKTLKSGQS-----IMKPIYNHETGL--  
 15790282\_Halobacterium -DRPFEEERANANYDHPDFAFEWELLRTHIDALLSGQS-----IEMPQYDFERHV--  
 6320223\_Saccharomyces -IRVINLDNMIENIKSYNNNDYDFDNILNLVYEKH-----AVTSQNDMIQHD--  
 1730776\_Saccharomyces -VPVDAKYNIQNWDSPREALDFKFLGKELDVIKQTGKIATKLIHNNNVDDPFTKFHIDR--  
 6324339\_Saccharomyces EDRAFAFKNEYDFDEPNAINLDLAYKCILNLKEGKR-----TNIPVYSFVHHN-R  
 22026891\_Drosophila KQHEQALINEYNFDHPDAFDIELLLDVLTKLKEGKR-----VEVPVYNFVTHG-R  
 8923487\_Homo QQEQAAAHNNFNFDHPDAFDLDLIIISTLKKLKQGS-----VKVPIYDFTTHS-R  
 TC909826\_Mus QQEQAAACNNFNFDHPDAFDLDLIIISTLKKLKQGRS-----VQVPIYDFTTHS-R  
 15232108\_Arabidopsis -SEELHVVQEYNFDHPDAFDTEQLLHCVDILKSGQP-----YQIPIYDFKTHQ-R  
 15222778\_Arabidopsis -EVELVRVHDYNFDHPDAFDTEQLLSSMEKLRKQQA-----VDIPNYDFKSYK-N  
 TC162174\_Glycine -----DYNFDHPEAFDTEQLLRVMDKLNKHSQA-----VDIPKYDFKGYK-N  
 18416764\_Arabidopsis -EELARVHEYNFDHPDAFDTEHLLSCMEKLRQQA-----VDIPKYDFKTYR-S  
 TC193979\_Zea -DEELVHVHNYNFDHPDAFHTELLSCMQLKKGKA-----VDIPNYNFKTYK--  
 15232164\_Arabidopsis -KEKLNKVHEYNFDHPDAFNTEVLLSCMEKLRSGQP-----VNIPSYDFKIHQ--  
 Dictyostelium\_sanger -LSKDNDPSKYNFDHPDAFDYDLMVKTISELRAGKK-----VNIPKYCFKTHS-R  
 chlamyUKUPRT -----VQEGKS-----AEVPIYDFAKHS-R  
 CryptoUKUPRT -LEEGQTMADYNFDHPNSVDFELLYNVLLSLKNGEG-----VHIPNYCFKQHK--  
 137110\_Saccharomyces -DRARAFKNEYDFDEPNAINLDLAYKCILNLKEGKR-----TNIPVYSFVHHN--  
 17539892\_Caenorhabditis EEIKAAHESRYNFDGPNAFDLDLLEVLKRLREGKS-----VDVPVYDFNTHS-R  
 28923467\_Neurospora ESSRKAFMNEYDFDSPEALDFDVLVDRQLDLKAGKR-----AEIPVYSFEKHA-R

2499951\_Toxoplasma -----  
 21358379\_Drosophila -----  
 21450816\_Homo -----  
 Paramecium4UPRT -----  
 18312741\_Pyrobaculum -----  
 29348200\_Bacteroides -----  
 17546907\_Ralstonia -----  
 22968125\_Rhodospirillum -----  
 16080742\_Bacillus -----  
 15835447\_Chlamydia -----  
 15803021\_Escherichia -----  
 23475563\_Desulfovibrio -----  
 22970181\_Chloroflexus -----  
 15643484\_Thermotoga -----  
 19551914\_Corynebacterium -----  
 23126288\_Nostoc -----  
 6647900\_Nicotiana -----  
 15607101\_Aquifex -----  
 28917005\_Neurospora -----  
 29841457\_Schistosoma -----  
 17506069\_Caenorhabditis -----  
 18203426\_Deinococcus -----  
 19703818\_Fusobacterium -----  
 22654174\_Streptococcus -----  
 120609\_Saccharomyces -----  
 22654176\_Mesorhizobium -----  
 Leishmania\_sanger -----  
 Tbrucei\_sanger -----  
 Crypto\_uprt -----

18699734\_Homo KEE-----TQTVYPADVVLFEGLAFYS---QEVRLDFQMKLFVDTD----ADTRL  
 13899253\_Homo LPE-----TTVVYPADVVLFEGLVFYS---QEIRDMFHLRLFVDTD----SDVRL  
 24649624\_Drosophila DFE-----NVLVIYPADVVLFEGLVFYF---PKIRELFHMKLFVDTD----SDTRL  
 17538198\_Caenorhabditis -MN-----GTVTVEPAKVIIIEGILLLYD---ERVKLLSTKLFVEKN---AESRL  
 28828393\_Dictyostelium EET-----VGLGDVDVILFEGLISFYT---QSLREQMDIKIFVDTD----SDTRL  
 Entamoeba\_sangerUK PD-----WVSVETGDVVIFEGLYTFYQMKKEYENYFDMFDLKIIFIESD----NDTRL  
 Paramecium1UK LDQ-----CSIMLP-AQVIVFEGLMALYD---ERIRDLMSYKIFIHCD----DDIRL  
 15641051\_Vibrio TEQ-----TTTMTPKKVIIEGILLLTD---PRLRDLMHATVFMDDTP---LDICL  
 26248441\_Escherichia MKE-----TQTVVEPKKVIIEGILLLTD---ARLRDELNFSIFVDDTP---LDICL  
 16272099\_Haemophilus TNE-----THTFTPKRIVILEGILLLTD---ERVRLQADISVFVDDTP---LDICF  
 15613838\_Bacillus SNE-----VILVEPKDVIIEGILLLED---ERLRELMDIKLFVDTD----ADIRI  
 15594361\_Borrelia RQL-----KTVLVVPVTPVVIVEGIMIFVE---ERVRNLIDLKIYIDTP---NDIRF  
 20455345\_Chlamydophila RSK-----TEIETIYPSKVIIVFEGLVFEN---QELRDLMDIRIFVDTD----ADERI  
 20455343\_Deinococcus RAA-----HTTRVLPGRVVVLEGGFFALYD---EELRSRMGLKVFVDAD---ADVRF  
 1351377\_Mycoplasma RAK-----KTAKIGPIDVVILEGLMPWFD---EKLSRLSKLKIIFIETN---GEERL  
 20455342\_Ureaplasma RLD-----KTIDISDVDVIVFEGLIYAIYD---DVINQIADLKIIFIETP---KDECL  
 20455333\_Listeria RKQ-----EVEIQEPREVIIEGILILED---KRLRDLMDIKVYVDDTP---DDIRF  
 17229842\_Nostoc FE-----PPQYIKPNKFVIIIEGLLGYST---RAARDCYDVKVYLAPP---ENLRA  
 16331050\_Synechocystis LD-----PPEKVEPNKVVVIEGLHPLYD---ERVRELVDVFGVYLDIS---EEVKI  
 15790282\_Halobacterium RKA-----DRVVVEPTDVIVLEGILALSD---ETVNDMLDLHIYVETD---ADVRI  
 6320223\_Saccharomyces YE-----D---PIDLIIVCGCYALYD---KRINEISQLKVFLLSD---ADKRL  
 1730776\_Saccharomyces QVWDELKAKYDSINDDKYEVVIVDGMIFNN---TGISKKFDLKIIVRAPYEVLLKRRRA  
 6324339\_Saccharomyces VPD-----KNIVYIGASVVVIEGIYALYD---RRLLDLMDLKIYVDAD---LDVCL  
 22026891\_Drosophila ESQ-----TKTMYG-ANVIFEGILTFHS---PEVLKLLDMKIFVDTD---PDIRL  
 8923487\_Homo KKD-----WKTLYG-ANVIFEGIMAFAD---KTLLELLDMKIFVDTD---SDIRL  
 TC909826\_Mus KKD-----WKTLYG-ANVIFEGIMAFAD---KTLLELLDMKIFVDTD---SDIRL  
 15232108\_Arabidopsis KVD-----AFRQVNACDVIIEGILVFHD---SRVRDLNMNKIFVDTD---ADVRL  
 15222778\_Arabidopsis NVF-----PPRRVNPSDVIIEGILIFHD---PRVRDLNMNKIFVDAD---ADVRL

|                          |                                                               |
|--------------------------|---------------------------------------------------------------|
| TC162174_Glycine         | DVF-----PARRVNPADVIIILEGILVFHD----PRVRALMNMKIFVDTD----ADVRL   |
| 18416764_Arabidopsis     | SVF-----RRVNPTDVIILEGILLFHD----PRVRKLMNMKIFVCTD----ADVRL      |
| TC193979_Zea             | SVP-----NARKVNPSDVIILEGILVFHD----SRLRDLNMNMKIFVDTD----ADVRL   |
| 15232164_Arabidopsis     | SIE-----SSSPVNPADVIIILEGILVLDND----PRVRDLNMNMKIFVDTD----ADVRL |
| Dictyostelium_sanger     | LVH-----QDTVYGADVIIILEGILTLYS----KELRDLMDIKIFIDTD----DDVRL    |
| chlamyUKUPRT             | SEE-----THTTGPADVIVVEGILVLM----QEVREMCNMKIFVDTD----DDLRL      |
| CryptoUKUPRT             | RLE-----TGRKVSPASIIIVEGIFILFH----PKIRHLINMSIFVDTD----DDIRL    |
| 175110_Saccharomyces     | RVP-----DKNIVIIYGASVVVIEGIYALYD----RRLDLMDLKIYVDAD----LDVCL   |
| 17539892_Caenorhabditis  | DPN-----SKMMYG-ADVLIFEGILAFHD----ERIKNLMDMKVFVDTD----GDLRL    |
| 28923467_Neurospora      | LDR-----TTAIYS-PHVLILEGIFALYD----PRVLELLDMKIFCEAD----ADTCL    |
| 2499951_Toxoplasma       | -----                                                         |
| 21358379_Drosophila      | -----                                                         |
| 21450816_Homo            | -----                                                         |
| Paramecium4UPRT          | -----                                                         |
| 18312741_Pyrobaculum     | -----                                                         |
| 29348200_Bacteroides     | -----                                                         |
| 17546907_Ralstonia       | -----                                                         |
| 22968125_Rhodospirillum  | -----                                                         |
| 16080742_Bacillus        | -----                                                         |
| 15835447_Chlamydia       | -----                                                         |
| 15803021_Escherichia     | -----                                                         |
| 23475563_Desulfovibrio   | -----                                                         |
| 22970181_Chloroflexus    | -----                                                         |
| 15643484_Thermotoga      | -----                                                         |
| 19551914_Corynebacterium | -----                                                         |
| 23126288_Nostoc          | -----                                                         |
| 6647900_Nicotiana        | -----                                                         |
| 15607101_Aquifex         | -----                                                         |
| 28917005_Neurospora      | -----                                                         |
| 29841457_Schistosoma     | -----                                                         |
| 17506069_Caenorhabditis  | -----                                                         |
| 18203426_Deinococcus     | -----                                                         |
| 19703818_Fusobacterium   | -----                                                         |
| 22654174_Streptococcus   | -----                                                         |
| 120609_Saccharomyces     | -----                                                         |
| 22654176_Mesorhizobium   | -----                                                         |
| Leishmania_sanger        | -----                                                         |
| Tbrucei_sanger           | -----                                                         |
| Crypto_uprt              | -----                                                         |

|                         |                                                               |
|-------------------------|---------------------------------------------------------------|
| 18699734_Homo           | SRRVLRDISERGRDLEQILSQYITFVKPAFEEFCLPTKKYADVIIIPRGA--D-----NL  |
| 13899253_Homo           | SRRVLRDVR-RGRDLEQILTQYTTFVKPAFEEFCLPTKKYADVIIIPRGV--D-----NM  |
| 24649624_Drosophila     | ARRVPRDINERGRDLDAVLTQYMTFVKPAFEEFCSPTKKFADVIIPRGA--D-----NT   |
| 17538198_Caenorhabditis | RNRLATYIRDYHRAPLSIIROYTEFVKPAFEEFCRPTKKYADVIIIPRGA--D-----NH  |
| 28828393_Dictyostelium  | SRRVMRDIAERGRSLEGLVLYQYEFVKPAFDDYILPTKKHADVIIPRGA--D-----NV   |
| Entamoeba_sangerUk      | ARRILRDINRGRRTLDSVLFQYKKFVKPAYDKWVYPQRKRADIIVP-----           |
| ParameciumlUK           | CRRILRDVKERQRTVESVLFQYTKFVKRAFENFIEPLMSQADLIIPGHR--S-----NH   |
| 15641051_Vibrio         | LRRVKRDVQERGRTMESVLKQYQETVVRPMMQFIEPSKQYADIIVPRGG--K-----NR   |
| 26248441_Escherichia    | MRRIKRDVNERGRSMDSVMAQYQKTVVRPMMFLQFIEPSKQYADIIVPRGG--K-----NR |
| 16272099_Haemophilus    | IRRLQDMEERGRSLQSVLDQYRATVVRPMMFLQFIEPSKQYADIVIPRGG--K-----NR  |
| 15613838_Bacillus       | IRRMVRDIRERGRTLESVIEQYTKVVRPMMHMQFIEPTKRYADVIIPEGG--Q-----NR  |
| 15594361_Borrelia       | IRRLRRDISKRGRTVESVIDQYLNTRRWGYRFFIEPTKEYADLIIPEGG-----HND     |
| 20455345_Chlamydophila  | LRRMVRDVQEQGDSVDCIMSRYLSMVKPMHEKFFIEPTRKYADIIVHGNY-----RQN    |
| 20455343_Deinococcus    | IRLLRDTQERGRTPESVIEQYLGVRPMMHLSFVEPTKRYADVIIIPGG-----MNE      |
| 1351377_Mycoplasma      | IRRIERDQW-RGRNIDSIIKQWREIVAPMYEIFVEKMKRNADLILPWSQ-----RRE     |
| 20455342_Ureaplasma     | IRRIIRDVNERNRSFESVITQWRSTVSPMYDQFVEPSKKNANVSVLWNE-----HNR     |
| 20455333_Listeria       | IRLLLRDMKERGRTMDSVIDQYLSVVKPMHNEFIEPTKKFADIIIPGG-----ENH      |
| 17229842_Nostoc         | KWKVKRDTQKRGYTFEQVLAELE-KREPDSEQFIRPQRQWSDIIVVSFYPPHEDGDETNGH |

|                          |                                                                |
|--------------------------|----------------------------------------------------------------|
| 16331050_Synechocystis   | NWKIQRDMAERGHTYEDILASIN-ARKPDFTAYIEPQKQYADVVIQVLP-----TRL      |
| 15790282_Halobacterium   | LRRIERDVVERGRELEGVMDQYLSTVKPMHEQFIEPTKRHADII IPEG-----ANS      |
| 6320223_Saccharomyces    | ISLIKKKNVGSNEQLAQLITEYMDHLRPEMQQYIEPTRTFADLIIPSTNEN-----LGRA   |
| 1730776_Saccharomyces    | SRKGYQTLDSFWVDPYFYDFEFVYESYRANHAQLFVNGDVEGLLDPRKS-----KNI      |
| 6324339_Saccharomyces    | ARRLSRDIVSRGRDLGCIQQWEKFKVKNPNAVKFKVPTMKNADAIIPSMS--D-----NA   |
| 22026891_Drosophila      | ARRLRRDISQRGRDLKGVKQYLNVMVKPSYCNYIAPTMAHADIIIVPRGG--D-----NK   |
| 8923487_Homo             | VRRLRRDISERGRDIEGVIKQYNKFKVPSFDQYIQPTMRLADIVVPRGS--G-----NT    |
| TC909826_Mus             | VRRLRRDISERGRDIEGVIKQYNKFKVPAFDQYIQPTMRLADIVVPRGS--G-----NT    |
| 15232108_Arabidopsis     | ARRIRRDIVERGRDVSLEQYAKFVKPAFDDFVLPSSKKYADVIIIPRGG--D-----NH    |
| 15222778_Arabidopsis     | ARRIKRDTVEKGRDIATVLDQYSKFKVPAFEDFILPTKKYADIIIPRGG--D-----NH    |
| TC162174_Glycine         | ARRIKRDTADNAREIGAVLDQYSKFKVPAFDDFILPTKKYADIIIPRGG--D-----NH    |
| 18416764_Arabidopsis     | ARRIKRDTVENGRDIGTVLDQYSKFKVPAFDDFILPTKKYADIIIPRGG--D-----NH    |
| TC193979_Zea             | TRRIHRDTIDKGRDLKAVLEQFSKFKVPAFEDFILPTKKYADVIIIPRGG--D-----ND   |
| 15232164_Arabidopsis     | SRRIQRDIVERGRNIQNVLEQYTKFKVPSFDEYIQPSMKYADIIIPRGG--D-----ND    |
| Dictyostelium_sanger     | ARLKRDI AERGR TLESVLHQYNTFVKPSFDYII-----PRGFDPE-----KT         |
| chlamyUKUPRT             | ARRIQRDVAHRGRDVASVLKQYTEHVKPMFDMYVAPSRRHADVIIIPWGNRDN-----NL   |
| CryptoUKUPRT             | VRRIRRD TIERGRQIDDI LNQYEKTVKPSYDEFIYPTRRYADIVIPHY-----NE      |
| 137110_Saccharomyces     | ARRLSRDIVSRGRDLGCIQQWEKFKVKNPNAVKFKVPTMKNADAIIPSMS-----DNA     |
| 17539892_Caenorhabditis  | ARRIVRDVTDGRGRDIDGIMEQYFTFVKPAFDKYIAPCMDSADLIVPRGG--E-----ND   |
| 28923467_Neurospora      | SRRI LR DVKDRGRDVGIIKQWFNYVKPNFEKFKVDPQRKVADIIIVPRGV--E-----NH |
| 2499951_Toxoplasma       | -----MAQVPAS-----GKLLVDPRY--S-----TN                           |
| 21358379_Drosophila      | ----SSGSQSEEGSSSDHQPPQ-----EAQEQQQLHTPT--H-----AH              |
| 21450816_Homo            | ----SMPCHNQVNSASTPSPEQLRPGDLILDHAGGNRASRAKVILLTG--Y-----AH     |
| Paramecium4UPRT          | -----                                                          |
| 18312741_Pyrobaculum     | -----                                                          |
| 29348200_Bacteroides     | -----                                                          |
| 17546907_Ralstonia       | -----                                                          |
| 22968125_Rhodospirillum  | -----                                                          |
| 16080742_Bacillus        | -----                                                          |
| 15835447_Chlamydia       | -----                                                          |
| 15803021_Escherichia     | -----                                                          |
| 23475563_Desulfovibrio   | -----                                                          |
| 22970181_Chloroflexus    | -----                                                          |
| 15643484_Thermotoga      | -----                                                          |
| 19551914_Corynebacterium | -----                                                          |
| 23126288_Nostoc          | -----                                                          |
| 6647900_Nicotiana        | -----                                                          |
| 15607101_Aquifex         | -----                                                          |
| 28917005_Neurospora      | -----                                                          |
| 29841457_Schistosoma     | -----                                                          |
| 17506069_Caenorhabditis  | -----                                                          |
| 18203426_Deinococcus     | -----                                                          |
| 19703818_Fusobacterium   | -----                                                          |
| 22654174_Streptococcus   | -----                                                          |
| 120609_Saccharomyces     | -----                                                          |
| 22654176_Mesorhizobium   | -----                                                          |
| Leishmania_sanger        | -----                                                          |
| Tbrucei_sanger           | -----                                                          |
| Crypto_uprt              | -----                                                          |
| 18699734_Homo            | VAINL-IVQHIQD--ILN-----                                        |
| 13899253_Homo            | VAINL-IVQHIQD--ILN-----                                        |
| 24649624_Drosophila      | VAIDL-IVHHIGE--ILA-----                                        |
| 17538198_Caenorhabditis  | VATDL-IAKNLQV--RFK-----                                        |
| 28828393_Dictyostelium   | VAIDL-IVQHISS--KLS-----                                        |
| Entamoeba_sangerUk       | -----                                                          |
| Paramecium1UK            | VSVAF-IVNHLKN--MAK-----                                        |
| 15641051_Vibrio          | IAIDV-LKAHIK--LLK-----                                         |

|                          |                                                               |
|--------------------------|---------------------------------------------------------------|
| 26248441_Escherichia     | IAIDI-LKAKISQ--FFE-----                                       |
| 16272099_Haemophilus     | IAINM-LKAQILH--LLN-----                                       |
| 15613838_Bacillus        | VAIDL-MVTKIRA--IIE-----                                       |
| 15594361_Borrelia        | KALYV-LSTFLKS--LSK-----                                       |
| 20455345_Chlamydomphila  | VVTNI-LSQKIKN--HLE-----                                       |
| 20455343_Deinococcus     | PALDM-LAARIR-----                                             |
| 1351377_Mycoplasma       | VSTSV-LDVAIEH--LFH-----                                       |
| 20455342_Ureaplasma      | VALHL-IHKWINN--IH-----                                        |
| 20455333_Listeria        | VAIDL-MTKIES--ILQ-----                                        |
| 17229842_Nostoc          | LNVRLVLRPTIPHPDFTS-----                                       |
| 16331050_Synechocystis   | IEDK--ESKLLRV--RLV-----                                       |
| 15790282_Halobacterium   | VAVNL-LEEKVQA--ETS-----                                       |
| 6320223_Saccharomyces    | VLVDG-IVKAIEDTKSQI-----                                       |
| 1730776_Saccharomyces    | KEFINDDDTPIAKPLSWV-----                                       |
| 6324339_Saccharomyces    | TAVNL-IINHKS--KLEIHELPTN-QVLSLHTMLLNK--NLNCADFVIFYDRLATILL    |
| 22026891_Drosophila      | VAIHL-IVQHVHT--QLQLHLLHPTP-QIKGLHTFIR--CRNTSRDEFIFYSKRLIRLVI  |
| 8923487_Homo             | VAINL-IVQHVHS--QLELSVLKSTP-QVRGMHTIIR--DKETSrDEFIFYSKRLMRLLI  |
| TC909826_Mus             | VAIDL-IVQHVHS--QLELSVLKSTP-QVRGMHTIIR--DKETSrDEFIFYSKRLMRLLI  |
| 15232108_Arabidopsis     | VAVDL-IVQHIHT--KLGVFVIETTF-QIRGMHTLIR--EKDISKHDFVIFYSDRLIRLVV |
| 15222778_Arabidopsis     | VAIDL-IVQHIHT--KLGlyVIQSTF-QIRGMHTLIR--DSKTTKHDFIFYSDRLIRLVV  |
| TC162174_Glycine         | VAIDL-IVQHIRT--KLGlyVIQSTF-QIRGMHTLIR--DAKTTKHDFIFYSDRLIRLVV  |
| 18416764_Arabidopsis     | VAIDL-IVQHIRT--KLGlyVIHSTF-QIRGMHTLIR--DSQTTKHDFVIFYSDRLIRLVV |
| TC193979_Zea             | VAIDL-IVQHIRT--KLGlyVIQTTY-QIRGMHTIIR--DAATATHDFIFYADRLIRLVV  |
| 15232164_Arabidopsis     | VAIDL-IVQHIRT--KLCIFIISSTF-QIKGMHTLIR--DINTTKHDFVIFYADRLIRLVV |
| Dictyostelium_sanger     | AQLDL-----IHVIKETN-QIKAMLSILR--NKDTKVGFVIFYSDRLCSLII          |
| chlamyUKUPRT             | VAIDL-IVEHIRT--KLOFQIIPSNF-QIQGMHTIIR--DRETSKEDFVIFYADRLNRLVV |
| CryptoUKUPRT             | VAVDL-VVQHLRY--KLKLIIPSNF-QIRHMHSIIR--NKDTSVVDVFWSDRLIRLVV    |
| 137110_Saccharomyces     | TAVNLIINHISKLELKSQSSPSQDV-LNRNIIHELP--PTNQVLSLHTMLLNKNLNCAD   |
| 17539892_Caenorhabditis  | VAIDM-IVQNVMA--QLVLFILKETP-QVKGLVTFVR--DRETSrDNHIFYSDRLMRLII  |
| 28923467_Neurospora      | VAMTM-VTQFIQQ--KLLVVQLDQTP-QLRGMNTLIH--DIDTSKEDFIFYFNRF'TLLI  |
| 2499951_Toxoplasma       | DQEES-ILQDI-----VVLKQTA-QLRAMMTIIR--DKETPKKEFVIFYADRLIRLLI    |
| 21358379_Drosophila      | AAVPA-ATSE-----LKLLECNs-QVAELLTILR--DKNTTRSDFKIFYADRLIRLVI    |
| 21450816_Homo            | SSLPA-ELDSGAC--GGSLKLLPMND-QIRELQTIIR--DKTASRGDFMFsADRLIRLVV  |
| Paramecium4UPRT          | -----MFKQILWY--QQQVGFDFRKNADRLIRILI                           |
| 18312741_Pyrobaculum     | -----VRIID-HV-YAQYLLTKLR--DKNTGSIEFRKGLVRLGRIG                |
| 29348200_Bacteroides     | -----IDFSQTNs-ILNQYISEIRNVEVQNDRLRFRNRIERGEIMA                |
| 17546907_Ralstonia       | -----LFILNHP-LIQHKLTHMR--DKDTSTRTFRELLREITLLMG                |
| 22968125_Rhodospirillum  | -----LFVLDHP-LIQHKLTHMR--RRETSTRTFRMLLREIALLLMG               |
| 16080742_Bacillus        | -----VYVFDHP-LIQHKLYIR--NENTGTKDFRELVEVATLMA                  |
| 15835447_Chlamydia       | -----AVYVLSHP-LIQHKASLLR--NKNTKSKIFRECLKEISLVC                |
| 15803021_Escherichia     | -----IVEVKHP-LVKHKLGLMR--EQDISTKRFRLEASEVGSLLT                |
| 23475563_Desulfovibrio   | -----VYAVDHP-LVKHKLGRRLR--QSDVPVAEFRALSNEVCRLLT               |
| 22970181_Chloroflexus    | -----VFVSRHP-LVQHKLALLR--SKWTEPKKFRRELVEIAQLLF                |
| 15643484_Thermotoga      | -----LVVVDHP-LIKHKLTIMR--DKNTGPKFRRELLREITLLLA                |
| 19551914_Corynebacterium | -----ITIVNHP-LVASRLTLR--DERSDNAAFRAAANDLGAMLI                 |
| 23126288_Nostoc          | -----RVYVPPHP-LIKHWLAVAR--DAGTPSVLFRSAMTELGRWLT               |
| 6647900_Nicotiana        | -----LVFVPPHP-LIKHWVSVLR--NEQTPCVIFRNAMSELGRLLM               |
| 15607101_Aquifex         | -----MIVELSHP-LIKHKVNTAR--IQDTSAEKLRKTLKELGFMLV               |
| 28917005_Neurospora      | -----VTVLSQTP-QLIALLSIIR--DKRTDRGDFIFYSNRIIRLLV               |
| 29841457_Schistosoma     | -----IILLQSD-HVRVLQTVIR--NRETPrNEFLFNADCLIRLVV                |
| 17506069_Caenorhabditis  | -----FVLLKKTp-QILELQTIK--DRSTNHSDVFNADRLMRLVI                 |
| 18203426_Deinococcus     | -----VTLV-EHP-LVQHKLsLMR--DERTGVKEFRRELAGEsLLLA               |
| 19703818_Fusobacterium   | -----VIEI-NHP-LIEHKMTILR--SVDTDTKsFRLENLIEIAKLMT              |
| 22654174_Streptococcus   | -----IEVI-NHP-LIQHKLSILR--RTDTSTKAFRELVEIAMLLMG               |
| 120609_Saccharomyces     | -----VYLL-PQTNQLLGLYTIIR--NKNTTRPDFIFYSDRIIRLLV               |
| 22654176_Mesorhizobium   | -----VTVV-DHP-LVQHKLTIMR--KKETSTAGFRLLREISLLLG                |
| Leishmania_sanger        | -----HLHLLPQTPQLHFLFTVIR--DVETQRTDFIFYSERIIRLIF               |
| Tbrucei_sanger           | -----TFHLLPQTNQLHFLFTIIR--QRETGRTDVIFYSERIIRLIV               |

Crypto\_uprt -----SLHICTQTPQLKGVMTILR--DANTSKEDFVFYTDTRICRIVL

18699734\_Homo -----  
13899253\_Homo -----  
24649624\_Drosophila -----  
17538198\_Caenorhabditis -----  
28828393\_Dictyostelium -----  
Entamoeba\_sangerUk -----  
ParameciumlUK -----  
15641051\_Vibrio -----  
26248441\_Escherichia -----  
16272099\_Haemophilus -----  
15613838\_Bacillus -----  
15594361\_Borrelia -----  
20455345\_Chlamydomydia -----  
20455343\_Deinococcus -----  
1351377\_Mycoplasma -----  
20455342\_Ureaplasma -----  
20455333\_Listeria -----  
17229842\_Nostoc -----  
16331050\_Synechocystis -----  
15790282\_Halobacterium -----  
6320223\_Saccharomyces -----  
1730776\_Saccharomyces -----  
6324339\_Saccharomyces SWALDDIP-VAHTNIITPGEH-TMENVIAC-QFDQVTAVNIIRSGDCFMKSLRKTIPNIT  
22026891\_Drosophila EYALSFLP-FKKTIVETPQGV-LYEGKRME-S-RKICGVSILRAGETMEQAVCDVCKDIR  
8923487\_Homo EHALSFLP-FQDCVVQTPQGO-DYAGKCYA-G-KQITGVSILRAGETMEPALRAVCKDVR  
TC909826\_Mus EHALSFLP-FQDCTVQTPQGO-DYVVKCYA-G-KQITGVSILRAGETMEPALRAVCKDVR  
15232108\_Arabidopsis EHGLGHLF-FTEKQVVPTPTGS-VYSGVDFC---KKLCGVSVIRSGESMENALRACCKGIK  
15222778\_Arabidopsis EHGLGHLF-FTEKQVVPTPTGS-VYSGVDFC---KKLCGVSVIRSGESMENALRACCKGIK  
TC162174\_Glycine EHGLGHLF-FTEKQVITPTGS-VYTGVDFC---KRLCGVSVIRSGESMENALRACCKGIK  
18416764\_Arabidopsis EHGLGHLF-FTEKQVITPTGC-VYSGVDFC---KRLCGVSVIRSGESMENALRACCKGIK  
TC193979\_Zea EHGLGHLF-FQEKQVITPTGS-VYTGVDFC---KRLCGVSVIRSGESMENALRACCKGIK  
15232164\_Arabidopsis EHGLGHLF-FTEKQVITPTGS-VYSGVDFC---KRLCGVSVIRSGESMENALRACCKGIK  
Dictyostelium\_sanger EEALTYLP-FTEKIVTPTPTGS-LYHGEELN---SRICALVVLVLRAGGCMEQPLRSICKGIR  
chlamyUKUPRT EAGLGFLLP-FTERSIVTPTGN-AYSGVGFA---RKLKCGVSVIRSGEAMEAALRACCKGIK  
CryptoUKUPRT ENALSHLS-FTGQTIETPIGE-LYDGVQFN-YKDKLCAVSVIRGGESMEIGLSAVCKDIP  
137110\_Saccharomyces FVFYFDRL-ATILLSWALDD-IPVAHTNII-TPGEHTMENVIACQFDQVTAVNIIRSGDC  
17539892\_Caenorhabditis EECMNHMP-YKDEIEMAGGR-KTIGKRKD---AQICGLPIMRAGECMETALRSIVKDCV  
28923467\_Neurospora EKAMDNIP-FASTTITTPLN-AYAGLRPR---GQVSAVVVLRGGALEAGLKRVLDPCK  
2499951\_Toxoplasma EEALNELP-FEKKEVTTPLDV-SYHGVSFY---SKICGVSIVRAGESMESGLRAVCRGCR  
21358379\_Drosophila EESLNQLP-YTHCDVETPTGA-IYEGLYK---SGNCGVSVIRSGEAMEQGLRDCCRSIR  
21450816\_Homo EEGLNQLP-YKECMVTTPTGY-KYEGVKFE---KGNCGVSVIRSGEAMEQGLRDCCRSIR  
Paramecium4UPRT EQAISQIE-KKKHIKQSPLG-----YY-DAHEICFVSVILRSGNAFLIEALKVMTGAS  
18312741\_Pyrobaculum YELAKTFP-VKYVEIETPLG---KAVGVDIIGL-DKVVIVQVLRRAAMPLVEGLVKAFDQAR  
29348200\_Bacteroides YEMSKEFR-YSVKNIRTPLG---IAPVSTPD--NQLVISTILRAGLPHFQGLSYFDGAE  
17546907\_Ralstonia YEITRNLP-LTTRHIETPMG---PMDAPVIA-G-RKLAVVPVLRAGVGMDSGLLELIP SAR  
22968125\_Rhodospirillum YEVTRSLP-LTTESIETPLE--AMEAPVIG-G-KKLVVVPILRAGQGMADG LLELIP SAR  
16080742\_Bacillus FEITRDLP-LEEVDINTPVQ---AAKSKVIS-G-KKLGVPVILRAGLGMVDGILKLIPAAK  
15835447\_Chlamydia YEATRDLA-LKNISIQTPLM--QAECPLT-G-TKIVVIPVLRAGLGMVDGFLALV PNAK  
15803021\_Escherichia YEATADLE-TEKVTIEGWNG--PVEIDQIK-G-KKITVVPILRAGLGMVDGLENV P SAR  
23475563\_Desulfovibrio YEATKDLA-TEKTQVEGWAG--PVEVEQIK-G-KKITVVPILRAGLGMVDG LLD MIPGAK  
22970181\_Chloroflexus YEATQDLA-LAPLTVETPLA--TCAGYEVA-E-R-IGIIPILRAGLGMVAEIVEILPTVH  
15643484\_Thermotoga YEATRHLK-CEEVEVETPIT--KTIGYRIN-D-KDIVVVPILRAGLVMADGILELLPNAS  
19551914\_Corynebacterium YEASRDLE-VEHFDTKTPVAMAEG--TRL--K-QPPIIVPIIRAGLGMIDPALS MIPDAQ  
23126288\_Nostoc YEAARDWLPTQETAVQTP LDT--CPATVIDPQ-IPVAVVPILRAGLGLLEGAQTLLPLAS  
6647900\_Nicotiana YEASRDWLPIITGEIQSPMGV--ASVEFVDP-EPVAIVPILRAGLALAEHASSILPATK  
15607101\_Aquifex YEALKDIL-LEEKEVRTWIGN--KRFNYLN-E-EEIVFVPILRAGLSFLEGALQVVPNAK

28917005\_Neurospora EEGLNHLP-TVEHPVTTTPVGR-IYDGLAFQ---GKICGVSIMRAGEAMEQGLRDCCRSVR  
29841457\_Schistosoma EEGLNQLP-YENVCVTTPTGN-LYHGKIFL---RGNCGVSIMRSGEAMERGLRDCCRSMR  
17506069\_Caenorhabditis EECLNHLP-FTEHTVTTPTGF-KYEGIQFN---RGNCGVSLCRSGEAMEVSLRQCCRCIR  
18203426\_Deinococcus YEAMRDLE-VEPVRFATPIE-E-GDFPMLS--GKKLALVAILRAGLVMTDAIVTLVPAAK  
19703818\_Fusobacterium YEATKNLK-LETTEVTTPLM-K-TQAYTLQ--DK-VALVPILRAGLGMVDGILDLIPTAK  
22654174\_Streptococcus YEVLRLDP-LEDVEIETPIT-K-TVQKQLA--GKKLAIVPILRAGIGMVDGLLNLVPAAK  
120609\_Saccharomyces EEGLNHLP-VQKQIVETDTNEN-FEGVSFM--GK-ICGVSIVRAGESMEQGLRDCCRSVR  
22654176\_Mesorhizobium YEVTRNLE-LTTTTIETPIE-T-MEAPTL--GKKLVFASVLRAGNGLLEGLLDLVPAAAR  
Leishmania\_sanger EAALCLIP-VKPFNVITPVGAVYRGRVDD---RGIIGVSIVRAGESMERVLREMCPCGVR  
Tbrucei\_sanger EAALNLIP-TIPYDVITPTGSKYQGCMTDG---QGIIGISILRAGEAMERVLRETCRQVR  
Crypto\_uprt EHALNLLP-YDYKEIKTPNGIEVKGI AFN----TPICGVSLIGSGEAMENALRFVCRGCR

18699734\_Homo -----  
13899253\_Homo -----  
24649624\_Drosophila -----  
17538198\_Caenorhabditis -----  
28828393\_Dictyostelium -----  
Entamoeba\_sangerUK -----  
Paramecium1UK -----  
15641051\_Vibrio -----  
26248441\_Escherichia -----  
16272099\_Haemophilus -----  
15613838\_Bacillus -----  
15594361\_Borrelia -----  
20455345\_Chlamydomyxa -----  
20455343\_Deinococcus -----  
1351377\_Mycoplasma -----  
20455342\_Ureaplasma -----  
20455333\_Listeria -----  
17229842\_Nostoc -----  
16331050\_Synechocystis -----  
15790282\_Halobacterium -----  
6320223\_Saccharomyces -----  
1730776\_Saccharomyces -----

6324339\_Saccharomyces IGKLLIQ-SDSQT-----GEPQLHCEFLPPNIEKFGKVFLMEGQIISGAAMIMAIQ-V  
22026891\_Drosophila IGKILIQ-TNLKT-----GEPELYLRLPKDIKDYK-VILMDATVATGAAAMMAIR-V  
8923487\_Homo IGTTILIQ-TNQLT-----GEPHYLRLPKDISDDH-VILMDCTVSTGAAAMMAVR-V  
TC909826\_Mus IGTTILIQ-TNQLT-----GEPHYLRLPKDISDDH-VILMDCTVSTGAAAMMAVR-V  
15232108\_Arabidopsis IGKILIH-RDGD-----NGMQLIYEKLPDISERH-VLLLDPVLGTGNSANQAI E-L  
15222778\_Arabidopsis IGKILIH-REGD-----NGQQLIYEKLPDISERH-VLLLDPILGTGNSAVQAIR-L  
TC162174\_Glycine IGKILIH-REGD-----NGQQLIYEKLPNDISDRH-VLLLDPILGTGNSAVQAI S-L  
18416764\_Arabidopsis IGKILIH-REGD-----NGQQLVYEKLPNDISERH-VLLLDPILGTGNSAVEAIN-L  
TC193979\_Zea IGKILIH-REGD-----NGQQLIYQNLPKDIANRH-VLLLDPILGTGNSAVQAI S-L  
15232164\_Arabidopsis IGKILIH-RENN-----DGRQLIYEKLPKDISSRH-VFLLDPVLASGYSAVKAIT-L  
Dictyostelium\_sanger TGKVLIQ-SDEMK-----KPHLFYEKLP-NVTD SH-VLVLDPTIATGASSEM AIR-V  
chlamyUKUPRT LGKILVHRHRDSS-----DVIYEKLP SDIADRH-VMLLDPLLTGGTAVKAIQ-I  
CryptoUKUPRT IGKILLE-FQNPKTELDAQFDKPKIIYCKLPDDIASRN-VFILDPI LGNGFGVFS AIK-Y  
137110\_Saccharomyces FMKSLRK-TIPNITIGKLLIQSDSQTGEPQLHCEFLPP-NIEKFGKVFLMEGQIISGA-A  
17539892\_Caenorhabditis IGKILIQ-TNETT-----FDPELHYIRLPPHITRYK-VIIMDATVTTGSAAMMAIR-V  
28923467\_Neurospora TGRVLIQ-SNMRT-----GEPHYLALPKDIDQHEAVLLLD AQMSSGGSALMAVQ-V  
2499951\_Toxoplasma IGKILIQ-RDETT-----AEPKLIYEKLPADIRDRW-VMLLDPMC ATAGSVCKAIE-V  
21358379\_Drosophila IGKILVE-SDANT-----HEARVVYARFPDDIGSRQ-VLLMYPIMSTGNTV LQAVN-V  
21450816\_Homo IGKILIQ-SDEET-----QRAKVVYAKFPDDIYRRK-VLLMYPILSTGNTV IEAVK-V  
Paramecium4UPRT IGQILIQRNEETS-----QPSYFFQKLPQNIK DQQ-VILVDPMLATGGSASMAIN-I  
18312741\_Pyrobaculum LGVVAAK-RREE-----GGVVDVDFYSKVPKIAEDDV-VIVADPMLATGITMSRVIE-E  
29348200\_Bacteroides NAFVSAY-RKYKD-----TLKFDIHIEYIASPRIDDK-T-LIITDPMLATGGSMELSYQ-A  
17546907\_Ralstonia VGHIGVY-RDEQH-----R-PVEYLVR LP-DLEERT-FILCDPMVATGHS AVHAVD-V  
22968125\_Rhodospirillum VGHIGLY-RDEVT-----RQPVEYLVKLP-ETTERT-FILVDPMLATGHS GAHAAT-V



16080742\_Bacillus VGHVGLY-RDPET-----LKPVEYYVKLPSDVEERE-FIVVDPMLATGGSAVEAIH-S  
15835447\_Chlamydia VGLIGMS-RNHET-----FQPSSYCCKLPEDIADCH-VFIVDPMLATGGASATIQL-L  
15803021\_Escherichia ISVVGMY-RNEET-----LEPVYPYFQKLVSNIDERM-ALIVDPMLATGGSVIATID-L  
23475563\_Desulfovibrio VSVVGMF-RNEET-----LEPVTTYTKLANNIEERQ-AIIIDPMLATGGTLVATID-L  
22970181\_Chloroflexus VVHLGLY-RDHET-----LQPVTYYNKLPSKPDIDL-TIIVDPMLATGGSAVAVD-I  
15643484\_Thermotoga VGHIGIY-RDPET-----LQAVEYYAKLPPLNDDKE-VFLLDPMLATGVSSIKAIE-I  
19551914\_Corynebacterium VGFIGLA-RDEET-----HEPVPLYEALPQDLSNQP-VFLVDPMLATGGSLHAIR-L  
23126288\_Nostoc VYHLGLA-RDEET-----LQPHCYLNKLPKDFPQTRVLITDPMLATGGSIMATMA-E  
6647900\_Nicotiana TYHLGIS-RNEET-----LQPSVYLNKLPDKFPEGSRVIVVDPMLATGGTIVAVID-L  
15607101\_Aquifex VGFLGIK-RNEET-----LESHIYYSRLPELK--GKIVVILDPMLATGGTLEVALR-E  
28917005\_Neurospora IGKILIQ-RDEET-----AQPCLFYDKLPEDIADRW-VLLLDPMFATGGSAIMAVE-V  
29841457\_Schistosoma IGKILIQ-KAEEN-----KIIDAKVYYAKFPNIEHRK-VLLMYPILGWN-----S  
17506069\_Caenorhabditis IGKILIG--DEQ-----KVLARLLPDITSRR-VLLLYPTIGSGTTVCKAIE-V  
18203426\_Deinococcus VGHIGMY-RDPQS-----LAPVAYYSKLPADIAERR-VFLTDPMMLATGGSANAAIQ-N  
19703818\_Fusobacterium VGHIGVY-RNEET-----LEPVYYYCKLPTDIASRK-VILVDPMLATGGSAVYVID-Y  
22654174\_Streptococcus VGHIGMY-RDEET-----LQPVYELVKLPEDIDQRQ-IFVVDPMMLATGGSAIIVD-S  
120609\_Saccharomyces IGKILIQ-RDEET-----ALPKLFYEKLPEDISERY-VFLLDPMLATGGSAIMATE-V  
22654176\_Mesorhizobium VAHIGLY-RDHET-----LEAVEYFFKAPSDLDLADRL-VIVVDPMLATANSAAIAID-K  
Leishmania\_sanger IGKILVQRDETST----DKTPDARFTYSKLPDVSARR-VLLLDPMCATGGSVIKATEIL  
Tbrucei\_sanger IGKILVQ-RDEKS---LEKAPDERFNYSKIPSDVSGRH-VLLLDPMIATGGSVIKATEIL  
Crypto\_uprt IGKVLLNNSSENE-----FDNAISAAVVKLPEDV SERV-VIVMSPVLGTGNSLCLIEVL

18699734\_Homo -----  
13899253\_Homo -----  
24649624\_Drosophila -----  
17538198\_Caenorhabditis -----  
28828393\_Dictyostelium -----  
Entamoeba\_sangerUK -----  
Paramecium1UK -----  
15641051\_Vibrio -----  
26248441\_Escherichia -----  
16272099\_Haemophilus -----  
15613838\_Bacillus -----  
15594361\_Borrelia -----  
20455345\_Chlamydomyxa -----  
20455343\_Deinococcus -----  
1351377\_Mycoplasma -----  
20455342\_Ureaplasma -----  
20455333\_Listeria -----  
17229842\_Nostoc -----  
16331050\_Synechocystis -----  
15790282\_Halobacterium -----  
6320223\_Saccharomyces -----  
1730776\_Saccharomyces -----  
6324339\_Saccharomyces LLDHG-IDLEKISVVVYLATEVGIIRILNAFDNKVNI FAGMIISREKLQ--NHQYKWALT  
22026891\_Drosophila LLDHD-VPEDNII LASLLMAEIGVHSIAYAFPVKVIVTSALDPEINSKF--YVIPGIGNF  
8923487\_Homo LLDHD-VPEDKIFLLSLLMAEMGVH SVAYAFPRVRIITTAVDKRVNDLF--RIIPGIGNF  
TC909826\_Mus LLDHD-VPEDKIFLLSLLMAEMGVH SVAYAFPRVRIITTAVDKRVNDLF--RIIPGIGNF  
15232108\_Arabidopsis LIQKG-VPEAHII FLNLI SAPEGIHCVCKRFPKLKI VTSEIDQCLNEEF--RVIPGLGEF  
15222778\_Arabidopsis LISKG-VPESNII FLNLI SAPEGVNVVCKKFPRIKI VTSEIELGLNDEF--RVVPGMGFEF  
TC162174\_Glycine LIKKG-VPESNII FLNLI SAPKGVHVVCKSFPRIKI VTSEIEI GLNDEF--RVIPGMGEF  
18416764\_Arabidopsis LISKG-VPEGNII FLNLI SAPQGVHVVCKKFPRIKI VTSEIDNGLNEEF--RVIPGMGEF  
TC193979\_Zea LLKKG-VQEANII FLNLI SAPQGVHVVSKRFPRVKI VTSEIEI FGLNDDF--RVVPGMGFEF  
15232164\_Arabidopsis LLSKG-VPESHII FLNLI AAPQGIHALCKKFPMLKI VTSEIDSSLNEDS--RVIPGLGEF  
Dictyostelium\_sanger LLDHG-VPENKII FVSVIASLKGILYLNRYFPDVQFVVS AIDKELSDEG--FILPGCGFY  
chlamyUKUPRT LKDRG-VPEDRILFLTI IAAPEGVHRVCSFPGVKLLTSE-----  
CryptoUKUPRT LLSKG-VLQRKII VLSLIVAHNAIHRICKEFPEVTLITTEIDRDVNSDG--FVIPGLGCF  
137110\_Saccharomyces MIMAI-QVLLDHGIDLEKISVVVYLATEVGIIRILNAFDNKVNI FAGMI--ISREKLQNH

17539892\_Caenorhabditis LLDHD-VKEEDIFVASLLMGQOGAHALAYAFPVKVLLITTAMDHQMTENC--YLIPGMGNF  
28923467\_Neurospora LVDHG-VKMDRIVLATYSAGRLGLHRLTTVFPEVTVVVGNVIQDVEERW--VEK-----  
2499951\_Toxoplasma LLRLG-VKEERII FVNILAAPOGIERVFKEYPKVRMVTA AVDICLNSRY--YIVPGLGDF  
21358379\_Drosophila LREHG-VPESCI ILSNLFCTPIAARTVVNAFPKLIKILTSELHP-----VAP--NHF  
21450816\_Homo LIEHG-VQPSVI ILLSLFSTPHGAKSIIQEFPEITILTTEVHP-----VAP--THF  
Paramecium4UPRT LKHHG-VKEENITFLTLVSC EQGLSKLFSEYPKIKIITAQVDPILLKDIN-YLAPGLGDF  
18312741\_Pyrobaculum VYRAG-NPGR-LIVVSVIATPMGI ERVLSRWPSAEIYAVAVDPTLNDKA--FIVPGLGDA  
29348200\_Bacteroides MLTKG-HPAE-IHVASIIASQHAIDHIKSVFPEDKTTIWCAAIDPEINEHSYIVPGLGDA  
17546907\_Ralstonia MKQRG-VPDEHILFLALVAAPEGVEVFQQAHPGVKLYVASLDSHLNEHA--YIIPGLGDA  
22968125\_Rhodospirillum LLRHG-VPAERIRFMALVAAPEGVRTFHAAHPDVPVYVAALDRQLNDQA--FICPGLGDA  
16080742\_Bacillus LKKRG-AKN--IRFMCLVAAPEGVEELQKHSDVDIYIAALDEKLNEKG--YIVPGLGDA  
15835447\_Chlamydia VKEHG-AKN--ITLLNLVAVPEGIERIQKDHPDVTIYVASLDEKLNEKA--YILPGLGDA  
15803021\_Escherichia LKKAG-CSS--IKVLVLAAPEGIAALEKAHPDVELYASIDQGLNEHG--YIIPGLGDA  
23475563\_Desulfovibrio LKKAG-CKQ--IRGLFLVAAPEGIKRVQDAHPDVDIYVA AVDDCLNENG--YILPGLGDA  
22970181\_Chloroflexus LKQWG-AQR--IKFLGLIAAPEGVRALSEAHDPVAIHAAIDSHLNERG--YIVPGLGDA  
15643484\_Thermotoga LKENG-AKK--ITLVALIAAPEGVEAVEKKYEDVKIYVAALDERLNDHG--YIIPGLGDA  
19551914\_Corynebacterium LADRG-ATD--ITAICMVSAQPGVDALAESGLPVRVLTATIDPGLDENA--YIVPGLGDA  
23126288\_Nostoc LTQRG-ADPSLTRIVCVVAAPPALQKLSEAYPGLIVYTATIDEKLNSKG--FIVPGLGDA  
6647900\_Nicotiana IKERG-VDNSQIKVICAVGAPPALQKLSEKFPGLHVVYAGILDPTVNDKG--FIIPGLGDA  
15607101\_Aquifex ILKHS-PLK--VKSVAIAAPEGKRIEEKFKEVEIFVGNVDERLNDKG--YIIPGLGDI  
28917005\_Neurospora LKSRG-VPEERII FLNILASPEGISNFASKFPKLRVTAFVDQGLDDKN--YIIPGLGDF  
29841457\_Schistosoma FKSFG-CFANL-----  
17506069\_Caenorhabditis LKEAR-VPDENIYLVSLFISPTGLKNI TRKYPYITVVASDITS-----LYP--NHF  
18203426\_Deinococcus LKDA--GAQ-SIKLMTILAAPEGIHAVQQAHPDVDIVTASVDSRLNDHG--YIVPGLGDA  
19703818\_Fusobacterium LKEQ--GVT-DIIFMCLVAAPDGIARLLNKHPDVPIY TAKIDQGLNENG--YIYPGLGDC  
22654174\_Streptococcus LKKR--GAS-NIKFVCLVSAPEGVKALQEAHPDVEIFTAALDERLNEHG--YIVPGLGDA  
120609\_Saccharomyces LIKRGVKPE-RIYFLNLICSKEGIEKYHAAFPEVRIVTGALDRGLDENK--YIVPGLGDF  
22654176\_Mesorhizobium LKGRGA--T-NIRFLCLLAAPEGIERFTKAHPDVPVFTASIDRQLNEKG--YIMPGLGDA  
Leishmania\_sanger INEYG-VLEEDII FLNLISAPAGIRKYLGRFPKIQIVTAAIDDDL DENR--YIVPGLGDF  
Tbrucei\_sanger INEYN-VPEENII FLNLISCEPLRRYLTAFFPHVNVVSAALDPGLDSRK--YIVPGLGDF  
Crypto\_uprt IKNN--VKEKNIICMALLSSKLA IERVFSQFPEIRLVISSIDYNLDENM--QVVPVGNF

18699734\_Homo -----  
13899253\_Homo -----  
24649624\_Drosophila -----  
17538198\_Caenorhabditis -----  
28828393\_Dictyostelium -----  
Entamoeba\_sangerUK -----  
Paramecium1UK -----  
15641051\_Vibrio -----  
26248441\_Escherichia -----  
16272099\_Haemophilus -----  
15613838\_Bacillus -----  
15594361\_Borrelia -----  
20455345\_Chlamydophila -----  
20455343\_Deinococcus -----  
1351377\_Mycoplasma -----  
20455342\_Ureaplasma -----  
20455333\_Listeria -----  
17229842\_Nostoc -----  
16331050\_Synechocystis -----  
15790282\_Halobacterium -----  
6320223\_Saccharomyces -----  
1730776\_Saccharomyces -----  
6324339\_Saccharomyces RFFDSKY  
22026891\_Drosophila GDRYFGT  
8923487\_Homo GDRYFGT  
TC909826\_Mus GDRYFGT

|                          |         |
|--------------------------|---------|
| 15232108_Arabidopsis     | GDRYFGT |
| 15222778_Arabidopsis     | GDRYFGT |
| TC162174_Glycine         | GDRYFGT |
| 18416764_Arabidopsis     | GDRYFGT |
| TC193979_Zea             | GDRYFGT |
| 15232164_Arabidopsis     | ADRYFGT |
| Dictyostelium_sanger     | SN----- |
| chlamyUKUPRT             | -----   |
| CryptoUKUPRT             | ADRYFGT |
| 137110_Saccharomyces     | QYKWALT |
| 17539892_Caenorhabditis  | GDRYYGT |
| 28923467_Neurospora      | --RYFRC |
| 2499951_Toxoplasma       | GDRYFGT |
| 21358379_Drosophila      | GQKYFGT |
| 21450816_Homo            | GQKYFGT |
| Paramecium4UPRT          | GDRYFGT |
| 18312741_Pyrobaculum     | GDRAFAT |
| 29348200_Bacteroides     | GDLAYGE |
| 17546907_Ralstonia       | GDRLFMT |
| 22968125_Rhodospirillum  | GDRLFMT |
| 16080742_Bacillus        | GDRMFGT |
| 15835447_Chlamydia       | GDRLCGT |
| 15803021_Escherichia     | GDKIFGT |
| 23475563_Desulfovibrio   | GDKIFGT |
| 22970181_Chloroflexus    | GDRQFGT |
| 15643484_Thermotoga      | GDRLFRT |
| 19551914_Corynebacterium | GDRLYGP |
| 23126288_Nostoc          | GDRTFGT |
| 6647900_Nicotiana        | GDRSFGT |
| 15607101_Aquifex         | GDRLYAV |
| 28917005_Neurospora      | GDRYYSM |
| 29841457_Schistosoma     | -----   |
| 17506069_Caenorhabditis  | STSYFGA |
| 18203426_Deinococcus     | GDRIYGT |
| 19703818_Fusobacterium   | GDRIFGT |
| 22654174_Streptococcus   | GDRLFMT |
| 120609_Saccharomyces     | GDRYYCV |
| 22654176_Mesorhizobium   | GDRMYGT |
| Leishmania_sanger        | GDRYFGT |
| Tbrucei_sanger           | GDRYFGT |
| Crypto_uprt              | GDRYFGI |

;

End;

[MacClade 4.03 registered to Jessica C. Kissinger, University of Georgia]

#NEXUS

{TK Alignment - only unambiguous positions are included.}

Begin data;

Dimensions ntax=21 nchar=213;

Format datatype=protein interleave symbols="1234" gap=-;

Matrix

```
Halobacterium_sp      -WVEVITGSMFSGKTEELLRRLRRAEIAQDVAAVTPAVDDRYGEA----
Deinococcus_radiodura -HLEVVGPMFSGKSEELIRRLTRSILIARQRVAVFKPAIDNRYHAS----
Bacillus_subtil       -WLELICGSMFSGKSEELIRRVKRATYAKQEVRFVKPVIDNRYSEA----
Mycoplasma_pneumoniae -WIEVICGPMFSGKTEELLRRIKRWKLAIPVIIIFKPKIDTR-QQH----
HUMAN                 GQIQVILGPMFSGKSTELMRRVRRFQIAQYKCLVIKYAKDTRYSS-----
Vaccinia_virus        GHIQLIIGPMFSGKSTELIRRVRRYQIAQYKCVTIKYSNDNRYGT-----
DICTYOSTELIUM_discoide -GKIQVIFGPMFSGKTEELIRRIKRFNFANKKCLLIKYSKDTRYNDNIDKS
Entamoeba_hist        -----MFSGKTTELIRLIKRFYRSKTTTVVIKYSKDTRYGS---ED
rypanosoma_brucei     GRIELIIGPMFAGKTTMELMRRVQRHKAQRSCYIIKYAGDTRYSEG----
Oryza_sativa          GEIHVIVGPMFAGKTTALLRRVQVEAGTGRNVALIKSDKDNRYGLD----
Thermotoga_maritima   -KLTVITGPMYSGKTTTELLSFVEIYKLGKKKVAVFKPKIDSRYHST----
Escherichia_coli      AQLYFYYSAMNAGKSTALLQSSYNYQERGMRTVVYTAEIDDRFGAG----
Haemophilus_influenzae -AKLYFYYSMTNAGKSTLLQSSYNYRERDMNTLVYTAIDDRFGVG----
xanthomonas          AKLYFYYSAMNAGKTTLLQSAHNYRERGMRTSILTPKLDHRAGSG----
Cparvum              AKLYFYYSAMNAGKSTVLLQSSFNYQERGMKTILFTISKDCRFEEG----
Mesorhizobium_loti   AKLYFNATMNAGKTTMLLQASNYRERGMTTMLFVAGHYRKGDSG----
Agrobacterium_tumefac -AKLYFNATMNAGKSTMLLQASNYRERGMRTLIFTAADFDRAGVG----
Streptococcus_pneumon -AQLYRYGTMNSGKTIIEILKVAYNYEEQGGVIMTSALDTRDVG----
Listeria_monocytogene -AQLFFRYGSMNSGKTIIEILKVAHNYEEQNKTVAIFTSIGIDDRDQVG----
Enterococcus_faecium -AQLFYRYGTMNSGKSIIEILKVAHNYEEQGRVIMTSAIDTRSGFG----
Streptomyces_avermiti -PELVFFSGTMDCGKSTLALQIGHNRSARGLQGVIFTR--DDRAGEG----

Halobacterium_sp      TLGSHAGRSWAATVVEPTAE-GVASIP-----TLLNGEQVVAIDEAN
Deinococcus_radiodura -EVASHAGRTLEAVAVPDAQA-IRAQLSGQGE-LLSAAPEGVDVIGIDEAQ
Bacillus_subtil       -AVVSHNGTSMTSYAISSAAD-IWDHIS-----ESTDVVAVDEVQ
Mycoplasma_pneumoniae -LVKSRNGHSDEAIEINSPLE-IYDYLTK-----DRFDVVAIDEAQ
HUMAN                 SFCTHD--RNTMEA-LPACL-LRDVA-----QEALGVAVIGIDEGQ
Vaccinia_virus        GLWTHD--KNNFEA-LEATK-LCDVL-----ESITDFSVIGIDEGQ
DICTYOSTELIUM_discoide -FLVTHD--KONYQA-FPCSI-LEDVK-----EQAQNYDVIGIDEGQ
Entamoeba_hist        EAISHD--KESWKA-IPMK-LMPVL-----ETALNYEVIGIDEGQ
rypanosoma_brucei     AITSHD--QRALTANVSNSN-LHDVG-----DEWRKYDVIAVDEGQ
Oryza_sativa          SVVTHDGTMKPCWALPELSS-FQDKLGT-----EAYDKVDVIGIDEAQ
Thermotoga_maritima   MIVSHSGNGVEAHVIERPEE-MRKYIE-----EDTRGVFIDEVQ
Escherichia_coli      KVSSRIGLSSPAKLFNQSS-LFDEIRA----EHEQQ--AIHCVLVEDEQ
Haemophilus_influenzae -KVTSRIGISQDAFLRSETN-LFDEINE----HLKKE--KVHCVLVEDEQ
xanthomonas          VVASRIGLRADGQTFDRQTELLQLIERD----IAAHG--PLHCVLVEDEQ
Cparvum              SICSRIGLSEKAHTFTPDLK-LLDIINQ----ENNKE--KIDCVLVEDEQ
Mesorhizobium_loti   LISSRIGLETEAEMFRDGDD-LFARVAE----HHDHT--TVHCVFVDEAQ
Agrobacterium_tumefac -RVASRIGLSEARTFDENTD-LFAEVAA----LHAQA--PVACVFVDEAN
Streptococcus_pneumon -YVSSRIGMKRPALAIETTD-IFGYIRD----LPE---KPYCVLVEDEAQ
Listeria_monocytogene -FISSRIGLKREATPIFSDTN-IFEIVVN----IKP---KPNCVLLDESO
Enterococcus_faecium -KVESRIGVSKPAIAITSEMD-VYGELVE----IIDQYGVDCILVDESO
Streptomyces_avermiti -KLSSRLGLVTEAVEAAPGMD-LHAYLVD----QMSKG-GKVDYLIVDEAQ

Halobacterium_sp      FFP---AELVDVCQELAA-DGRRVVLSGTDQTFRGEFPFVPPQLMAIAEY
Deinococcus_radiodura -FFG---PELVPLVLELAD-AGVRVVLAGLDLDFRAEPPFGSMPELLARAES
Bacillus_subtil       -FFD---QEIVEVLSLAD-KGYRVIAAGLDMDFRGEPPFGVVPNIMAIAS
Mycoplasma_pneumoniae -FFS---SEIVEVVKSLND-LGINVIVSGLDTFRAEPPFGSIPQLLAIADK
HUMAN                 FFP----DIVEFCEAMAN-AGKTIVIVAALDGTFFQRPFGAILNLVPLAES
Vaccinia_virus        FFP----DIVEFCERMAN-EGKIVIVAALDGTFFQRPFNINLNLIPSEM
DICTYOSTELIUM_discoide -FFP----DVVQFSEDLAN-QGKTVIAALDGTFFQRPQSVIDLVSKAEY
Entamoeba_hist        FFP----DLIEFSEACAS-YGRLVIAALDGTFFQRPFGQITDLIPLCES
rypanosoma_brucei     FFP----GVAAFCSKAAD-SGKVIVSALDADYLQEPFEEICLLVSRADS
```

Oryza\_sativa FFD---DLHDFCCKAADRDGKIVVAGLDGDYKRNKFGSVLDIIPLADS  
 Thermotoga\_maritima FFN---PSLFEVVKDLLD-RGIDVFCAGLDLTHKQNPFFETTALLLSLADT  
 Escherichia\_coli FLT---RQQVYELSEVVDQLDIPVLCYGLRTDFRGELFIGSQYLLAWSKD  
 Haemophilus\_infulenzae FLS---KQQVYQLSDVVDKLRIPVLCYGLRTDFQAELEFEGSKYLLAWADQ  
 xanthomonas FLS---SAQVWQLSEVVDRLRIPVLCYGLRTDFRGELFEGSQYLLAWADE  
 Cparvum FLT---KFQVRELICIVVDKLNIPVLCYGLRTDFKGNLFEGSKYLLAWADK  
 Mesorhizobium\_loti FLE---EEQVWQLARIADRLNIPVMCYGLRTDFQKLFSGSRALLAIADD  
 Agrobacterium\_tumefac FLS---EHHVWQLANIADRLNIPVMTYGLRTDFQKLFASKELLAIADAE  
 Streptococcus\_pneumon FLK---RHHVYDLARVDELDIPVMAFGLKNDFRNELFEGSKYLLLLADK  
 Listeria\_monocytogene FLE---KEHVFQAKIVDELNIPVIAVYGLKNDFRNELFEGSKYLLLYADK  
 Enterococcus\_faecium FLS---RENIIDLSLIVMNEEVPVICYGLKNDFQNNLFKGSSEALLTFADK  
 Streptomyces\_avermiti FLA---PEQIDQLARVDDLDLDFVAFGITTDFRTKLFPQSQRLIEELADR

Halobacterium\_sp VD--KMRAICMQCGE-PATRNORLIEGEPAHYDDPTVMVGAEEF-----  
 Deinococcus\_radiodura VD--KLTAICTVCGA-PARTORLIGGQPARFDDPVVLVGAQES-----  
 Bacillus\_subtil VT--KLQAVCSVCGS-PASRTQRLIDGKPASYDDPVILVGAES-----  
 Mycoplasma\_pneumoniae IC--KLDAVCNVCGQ-LAQRTRQIVS-----KSNETVLIGDIEA-----  
 HUMAN VV--KLTAVCMCEFR-EAAATKRLGT-----EKEVEVIGGADK-----  
 Vaccinia\_virus VV--KLTAVCMCKCFK-EASF SKRLGE-----ETEIEIIGGNDM-----  
 DICTYOSTELIUM\_discoide IT--KLTAVCMVCYN-EAAFSKRIVE-----SDDIELIGGIDK-----  
 Entamoeba\_hist VK--KLSAVCVNCGK-KAAFSRLTSS-----EESIEVIGGVDK-----  
 rypanosoma\_brucei VV--KLSAVCMECHNRKASFTYRTVK-----SDERKLVGGSDM-----  
 Oryza\_sativa VT--KLTAARCELGR-RAFFTLRKRTR-----ETKTELIGGADV-----  
 Thermotoga\_maritima VI--KKKAVCHRCEYNAATLTLKVAG-----GEEIDVGGQEK-----  
 Escherichia\_coli LV--ELKTICF-CGR-KASMLRLDQAGRPYNEGEQVVIIGGNER-----  
 Haemophilus\_infulenzae LE--ELKTICY-CGR-KANFVLRRLNDQGEVIKEGAQIQIGGNS-----  
 xanthomonas LE--EIKTICH-SGS-KATMTVRVDAQGHAVQDGPQVEIIGGNER-----  
 Cparvum LT--EIKTICR-CGK-KATMTIRLNSNGEPVFSGEQILIGDNSI-----  
 Mesorhizobium\_loti LR--EVRTICR-CGR-KATMVVRLGADGKVARQGEQVAIG-KDV-----  
 Agrobacterium\_tumefac LR--EIRTICR-CGR-KATMVARFDSEGKVVTEGAQIEVGGNGK-----  
 Streptococcus\_pneumon ID--EIKTICQYCKK-KATMVLRTQD-GLPVYDGEQIQIGGNET-----  
 Listeria\_monocytogene LE--EMKTICWFCAK-KATMVLRVDDKGPVYTGEQIMIGGNDH-----  
 Enterococcus\_faecium IE--EIKTICHFCNK-KAVMNARIVD-GIPVYSGEQIVVGGNED-----  
 Streptomyces\_avermiti IETLQVEAMCW-CGA-RATHNARTVG-GEMVVEGEQVVVGDVNRPAAEVGG

Halobacterium\_sp YEACRNCHVVR  
 Deinococcus\_radiodura YEALPRAPHRAQG  
 Bacillus\_subtil YEACRHHHEVPG  
 Mycoplasma\_pneumoniae YEPRCKLHQPSAG  
 HUMAN YHSVCRLCYFKKA  
 Vaccinia\_virus YQSVCRKCYIDS-  
 DICTYOSTELIUM\_discoide YISVCRGCYNSDQ  
 Entamoeba\_hist YCAVCRK-----  
 rypanosoma\_brucei YMSVCRSCYETKR  
 Oryza\_sativa YMPVCRQHYLDGQ  
 Thermotoga\_maritima YIAVCRDCYNTLK  
 Escherichia\_coli YVSVCRKHYKEAL  
 Haemophilus\_infulenzae YLSVCRLHYKEKC  
 xanthomonas YVSVSRAEFKKIM  
 Cparvum YTSVCRKHHIINC  
 Mesorhizobium\_loti YVSLCRRHWEEEM  
 Agrobacterium\_tumefac YVSFCRRHWVETF  
 Streptococcus\_pneumon YISVCRKHYFAPM  
 Listeria\_monocytogene YYPVCRKCHANPP  
 Enterococcus\_faecium YLSVCRNHYYNED  
 Streptomyces\_avermiti YEVLCRRHHRRM

;  
 End;

Thymidine kinase (TK) accession numbers are: *Agrobacterium tumefaciens*, NP\_355239; *Bacillus subtilis*, NP\_391587; *Cryptosporidium parvum*, AY466379; *Deinococcus radiodurans*, NP\_295707; *Dictyostelium discoideum*, AAB03673; *Entamoeba histolytica*, AY466383; *Enterococcus faecium*, ZP\_00035626; *Escherichia coli*, NP\_309767; *Haemophilus influenzae*, P44309; *Halobacterium sp.*, NP\_280328; *Homo sapiens*, P04183; *Listeria monocytogenes*, NP\_466067; *Mesorhizobium loti*, NP\_104016; *Mycoplasma pneumoniae*, NP\_109732; *Oryza sativa*, AAO17013; *Streptococcus pneumoniae*, NP\_345493; *Streptomyces avermitilis*, BAC70125; *Thermotoga maritime*, NP\_228211; *Trypanosoma brucei*, AAM95606; *Vaccinia virus*, NP\_063745; *Xanthomonas campestris*, AAM43364.

GenBank accession numbers for additional *Cryptosporidium parvum* genes identified in this study are: adenosine kinase, AY466390; adenosine monophosphate dehydrogenase, AY466391; guanosine monophosphate synthase, AY466392; adenosine transporter, AY466393; uracil phosphoribosyltransferase, AY466394.
